# Supplementary material for: Atmospheric OH reactivity in the western United States determined from comprehensive gas-phase measurements during WE-CAN
Source: Royal Society of Chemistry journal article supplement (doi:10.1039/d2ea00063f), 2022-10-31
Supplement: d2ea00063f1.pdf [file d2ea00063f1.pdf]

**Figure S1:** WE-CAN research flight tracks colored by the total calculated OH reactivity (tOHR,  $s^{-1}$ ) for free troposphere and aged smoke sampling periods. The maximum total OH reactivity is limited to the 95<sup>th</sup> percentile.

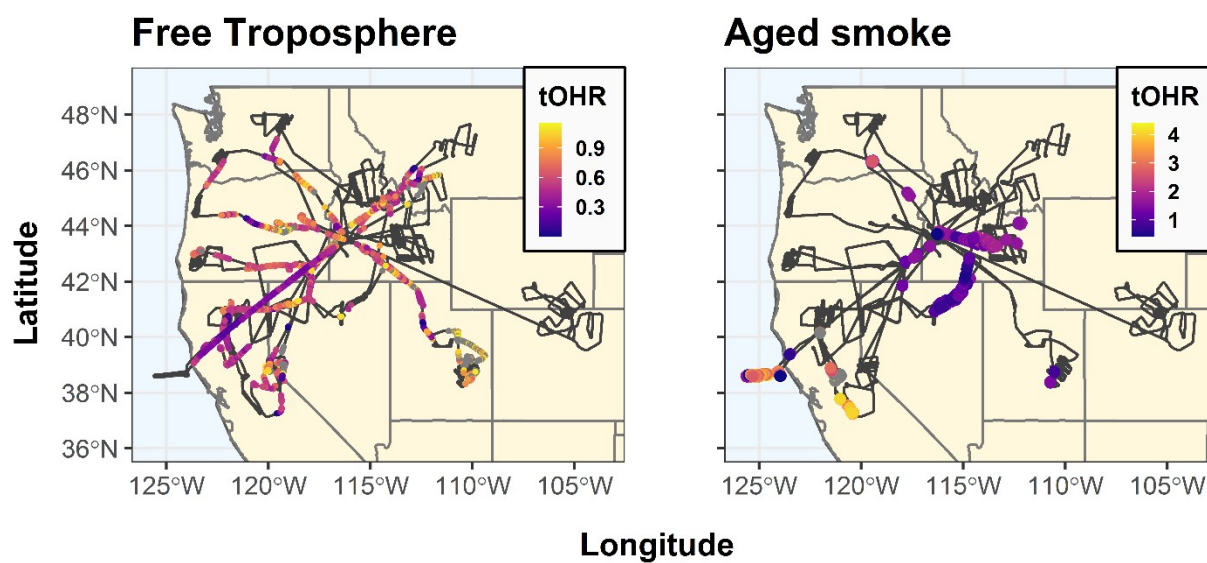

**Figure S2.** Total gas OH reactivity profiles for 24 fires reported in this work. Emission transects of the same fire completed more than 30 minutes apart are treated as separate fires and denoted with a, b, etc. Average total calculated OH reactivities ( $s^{-1}$ ) are shown for each transect to the right of the bars.

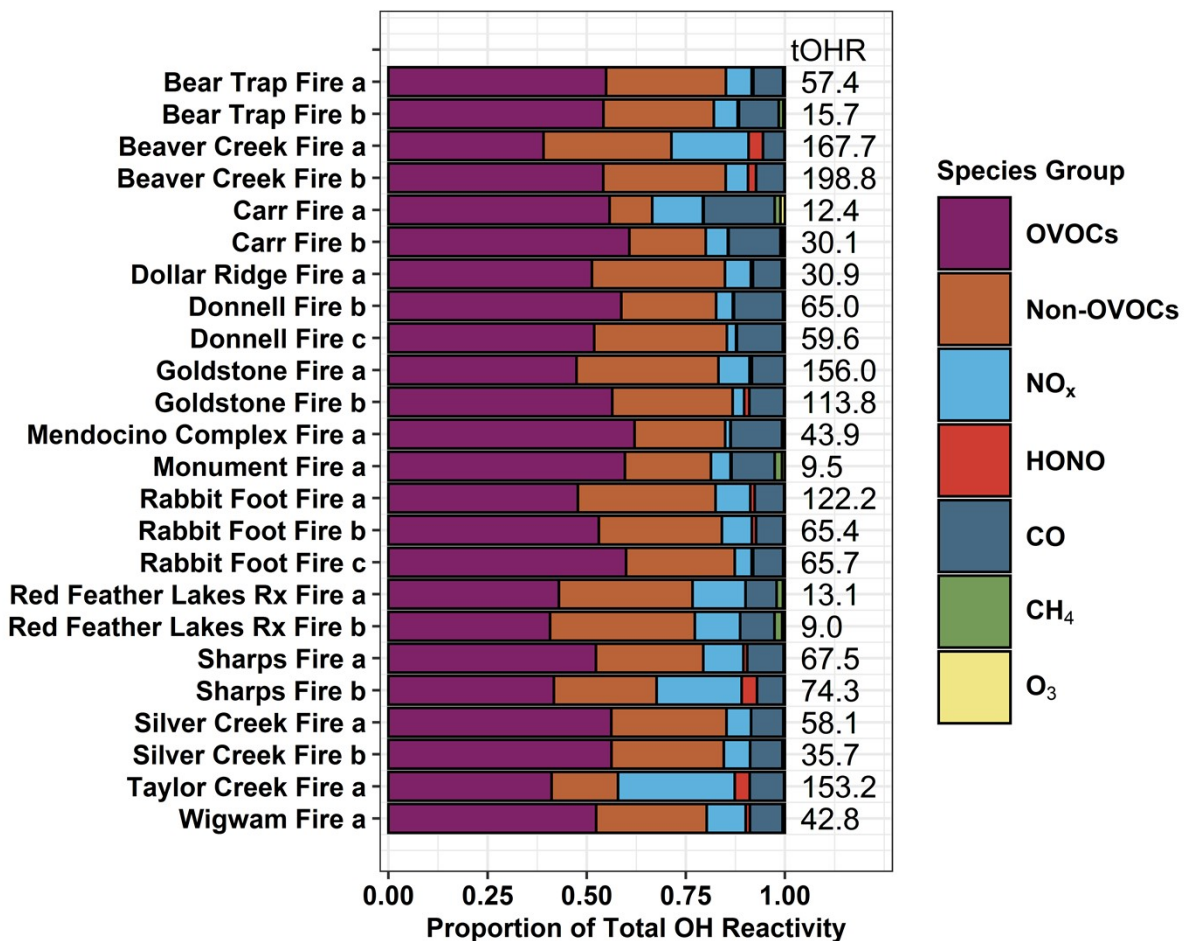

**Figure S3.** The proportion of VOC groups comprising the non-implemented VOC OHR fraction shown in Figure 4c. These groups represent those species that were measured during WE-CAN but are not implemented for biomass burning in the GEOS-Chem CTM.

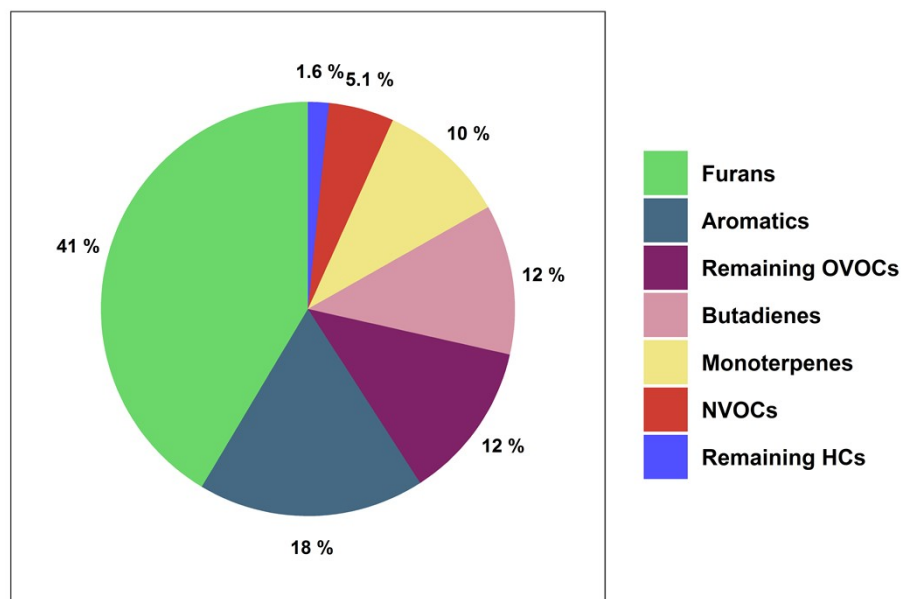

**Table S1.** VOC species used in this work, including the instrument each species was measured by, the isomeric fractional contributions to the PTR-ToF-MS measured ion, measurement uncertainty, and weighted rate constants for the reaction with the OH radical. <sup>1,2</sup>

| Formula                                      | Dominant isotopologue mass (da) | VOC contributor     | Instrument | Fractional contribution to PTR-ToF-MS ion signal | Uncertainty (%) | $k_{OH}$ ( $10^{-12}$ cm <sup>3</sup> molecule <sup>-1</sup> s <sup>-1</sup> ) |
|----------------------------------------------|---------------------------------|---------------------|------------|--------------------------------------------------|-----------------|--------------------------------------------------------------------------------|
| C <sub>2</sub> H <sub>2</sub>                | 26.0157                         | Ethyne              | AWAS       |                                                  | 10              | 1                                                                              |
| HCN                                          | 27.0109                         | Hydrogen cyanide    | CIMS       |                                                  | 30              | 0                                                                              |
| C <sub>2</sub> H <sub>4</sub>                | 28.0313                         | Ethene              | AWAS       |                                                  | 10              | 7.8                                                                            |
| CH <sub>2</sub> O                            | 30.0106                         | Formaldehyde        | PTR        | 1                                                | 40              | 8.5                                                                            |
| C <sub>2</sub> H <sub>6</sub>                | 30.0470                         | Ethane              | AWAS       |                                                  | 10              | 0.24                                                                           |
| CH <sub>4</sub> O                            | 32.0262                         | Methanol            | PTR        | 1                                                | 15              | 0.8                                                                            |
| C <sub>2</sub> H <sub>3</sub> N              | 41.0265                         | Acetonitrile        | PTR        | 1                                                | 15              | 0                                                                              |
| C <sub>3</sub> H <sub>6</sub>                | 42.0470                         | Propene             | PTR        | 0.62                                             | 50              | 30                                                                             |
| C <sub>3</sub> H <sub>6</sub>                | 42.0470                         | Fragments           | PTR        | 0.38                                             |                 |                                                                                |
| HNCO                                         | 43.0058                         | Isocyanic acid      | PTR        | 1                                                | 50              | 0                                                                              |
| C <sub>2</sub> H <sub>5</sub> N              | 43.0422                         | Ethenamine          | PTR        | 1                                                | 50              | 0.2                                                                            |
| C <sub>2</sub> H <sub>4</sub> O              | 44.0262                         | Acetaldehyde        | PTR        | 1                                                | 15              | 15                                                                             |
| C <sub>3</sub> H <sub>8</sub>                | 44.0626                         | Propane             | TOGA       |                                                  | 30              | 1.09                                                                           |
| CH <sub>3</sub> NO                           | 45.0215                         | Formamide           | PTR        | 1                                                | 50              | 1.5                                                                            |
| CH <sub>2</sub> O <sub>2</sub>               | 46.0055                         | Formic acid         | CIMS       |                                                  | 30              | 0.4                                                                            |
| C <sub>2</sub> H <sub>6</sub> O              | 46.0419                         | Ethanol             | TOGA       |                                                  | 30              | 3.2                                                                            |
| HONO                                         | 47.0007                         | HONO                | CIMS       |                                                  | 30              | 6                                                                              |
| C <sub>4</sub> H <sub>4</sub>                | 52.0313                         | 1-Buten-3-yne       | PTR        | 0.87                                             | 50              | 20                                                                             |
| C <sub>4</sub> H <sub>4</sub>                |                                 | Fragments           | PTR        | 0.13                                             |                 |                                                                                |
| C <sub>3</sub> H <sub>3</sub> N              | 53.0265                         | Acrylonitrile       | PTR        | 1                                                | 50              | 4                                                                              |
| C <sub>3</sub> H <sub>2</sub> O              | 54.0106                         | 2-Propynal          | PTR        | 1                                                | 50              | 20                                                                             |
| C <sub>4</sub> H <sub>6</sub>                | 54.0470                         | 1,3-Butadiene       | PTR        | 0.82                                             | 50              | 58.8                                                                           |
| C <sub>4</sub> H <sub>6</sub>                | 54.0470                         | 1,2-Butadiene       | PTR        | 0.01                                             | 50              | 58.8                                                                           |
| C <sub>4</sub> H <sub>7</sub>                |                                 | Fragments           | PTR        | 0.17                                             |                 |                                                                                |
| C <sub>3</sub> H <sub>5</sub> N              | 55.0422                         | Propanenitrile      | PTR        | 1                                                | 50              | 0.3                                                                            |
| C <sub>3</sub> H <sub>4</sub> O              | 56.0262                         | Acrolein            | TOGA       |                                                  | 30              | 20                                                                             |
| C <sub>4</sub> H <sub>8</sub>                | 56.0626                         | Butenes             | PTR        | 0.59                                             | 15              | 31.8                                                                           |
| C <sub>4</sub> H <sub>9</sub>                |                                 | Fragments           | PTR        | 0.41                                             |                 |                                                                                |
| C <sub>2</sub> H <sub>3</sub> NO             | 57.0215                         | Methyl isocyanate   | PTR        | 0.5                                              | 50              | 0.1                                                                            |
| C <sub>2</sub> H <sub>3</sub> NO             | 57.0215                         | Hydroxyacetonitrile | PTR        | 0.5                                              | 50              | 0.1                                                                            |
| C <sub>3</sub> H <sub>7</sub> N              | 57.0578                         | Propene amine       | PTR        | 1                                                | 50              | 15                                                                             |
| C <sub>2</sub> H <sub>2</sub> O <sub>2</sub> | 58.0055                         | Glyoxal             | PTR        | 1                                                | 50              | 11                                                                             |
| C <sub>3</sub> H <sub>6</sub> O              | 58.0419                         | Acetone             | PTR        | 0.83                                             | 20              | 0.2                                                                            |
| C <sub>3</sub> H <sub>6</sub> O              | 58.0419                         | Propanal            | PTR        | 0.17                                             | 20              | 0.2                                                                            |
| C <sub>4</sub> H <sub>10</sub>               | 58.0783                         | Isobutane           | TOGA       |                                                  | 15              | 2.3                                                                            |

|                                               |         |                                          |      |      |    |       |
|-----------------------------------------------|---------|------------------------------------------|------|------|----|-------|
| C <sub>4</sub> H <sub>10</sub>                | 58.0783 | n-Butane                                 | TOGA |      | 15 | 2.4   |
| C <sub>2</sub> H <sub>5</sub> NO              | 59.0371 | Acetamide                                | PTR  | 1    | 50 | 8.6   |
| C <sub>3</sub> H <sub>9</sub> N               | 59.0735 | Trimethylamine                           | PTR  | 1    | 50 | 60    |
| C <sub>2</sub> H <sub>4</sub> O <sub>2</sub>  | 60.0211 | Acetic acid                              | PTR  | 0.67 | 40 | 3.7   |
| C <sub>2</sub> H <sub>4</sub> O <sub>2</sub>  | 60.0211 | Glycolaldehyde<br>(=hydroxyacetaldehyde) | PTR  | 0.33 | 40 | 3.7   |
| C <sub>3</sub> H <sub>8</sub> O               | 60.0575 | Isopropanol                              | TOGA |      | 30 | 5.7   |
| CH <sub>3</sub> NO <sub>2</sub>               | 61.0164 | Nitromethane                             | PTR  | 1    | 50 | 0     |
| C <sub>2</sub> H <sub>6</sub> S               | 62.0190 | Dimethyl sulfide                         | AWAS |      | 10 | 6     |
| C <sub>4</sub> H <sub>3</sub> N               | 65.0265 | Cyanoallene isomers                      | PTR  | 1    | 50 | 4     |
| C <sub>5</sub> H <sub>6</sub>                 | 66.0470 | 1,3-Cyclopentadiene                      | PTR  | 0.22 | 50 | 92    |
| C <sub>5</sub> H <sub>7</sub>                 |         | Fragments                                | PTR  | 0.78 |    |       |
| C <sub>4</sub> H <sub>5</sub> N               | 67.0422 | Pyrrole                                  | PTR  | 0.57 | 50 | 111.4 |
| C <sub>4</sub> H <sub>5</sub> N               | 67.0422 | Butene nitrile isomers                   | PTR  | 0.43 | 50 | 111.4 |
| C <sub>3</sub> O <sub>2</sub>                 | 67.9898 | Carbon suboxide                          | PTR  | 1    | 50 | 1.5   |
| C <sub>4</sub> H <sub>4</sub> O               | 68.0262 | Furan                                    | TOGA |      | 40 | 40    |
| C <sub>5</sub> H <sub>8</sub>                 | 68.0626 | Isoprene                                 | PTR  | 0.63 | 20 | 100   |
| C <sub>4</sub> H <sub>7</sub> N               | 69.0578 | Butane nitrile                           | PTR  | 0.61 | 50 | 7.7   |
| C <sub>4</sub> H <sub>7</sub> N               | 69.0578 | Dihydropyrrole                           | PTR  | 0.39 | 50 | 7.7   |
| C <sub>3</sub> H <sub>2</sub> O <sub>2</sub>  | 70.0055 | Propiolic acid                           | PTR  | 1    | 50 | 26    |
| C <sub>4</sub> H <sub>6</sub> O               | 70.0419 | Methyl vinyl ketone                      | PTR  | 0.6  | 20 | 24.8  |
| C <sub>4</sub> H <sub>6</sub> O               | 70.0419 | Methacrolein                             | PTR  | 0.28 | 20 | 24.8  |
| C <sub>4</sub> H <sub>6</sub> O               | 70.0419 | 2-Butenal (=crotonaldehyde)              | PTR  | 0.13 | 20 | 24.8  |
| C <sub>5</sub> H <sub>10</sub>                | 70.0783 | Pentene, Methylbutenes                   | PTR  | 0.69 | 50 | 57.2  |
| C <sub>5</sub> H <sub>11</sub>                |         | Fragments                                | PTR  | 0.31 |    |       |
| C <sub>4</sub> H <sub>9</sub> N               | 71.0735 | Buteneamines,<br>Tetrahydropyrrole       | PTR  | 1    | 50 | 25    |
| C <sub>3</sub> H <sub>4</sub> O <sub>2</sub>  | 72.0211 | Pyruvaldehyde (=methyl<br>glyoxal)       | PTR  | 0.5  | 50 | 21.1  |
| C <sub>3</sub> H <sub>4</sub> O <sub>2</sub>  | 72.0211 | Acrylic acid                             | PTR  | 0.5  | 50 | 21.1  |
| C <sub>4</sub> H <sub>8</sub> O               | 72.0575 | Methyl ethyl ketone                      | PTR  | 0.85 | 20 | 5.5   |
| C <sub>4</sub> H <sub>8</sub> O               | 72.0575 | 2-Methyl propanal                        | PTR  | 0.14 | 20 | 5.5   |
| C <sub>4</sub> H <sub>8</sub> O               | 72.0575 | Butanal                                  | PTR  | 0.01 | 20 | 5.5   |
| C <sub>5</sub> H <sub>12</sub>                | 72.0939 | n-Pentane                                | TOGA |      | 15 | 3.9   |
| C <sub>5</sub> H <sub>12</sub>                | 72.0939 | Isopentane                               | TOGA |      | 15 | 3.9   |
| C <sub>2</sub> H <sub>3</sub> NO <sub>2</sub> | 73.0164 | Nitroethene                              | PTR  | 1    | 50 | 1.2   |
| C <sub>3</sub> H <sub>6</sub> O <sub>2</sub>  | 74.0368 | Hydroxyacetone                           | PTR  | 0.5  | 50 | 2.2   |
| C <sub>3</sub> H <sub>6</sub> O <sub>2</sub>  | 74.0368 | Methyl acetate                           | PTR  | 0.35 | 50 | 2.2   |
| C <sub>3</sub> H <sub>6</sub> O <sub>2</sub>  | 74.0368 | Ethyl formate                            | PTR  | 0.14 | 50 | 2.2   |
| C <sub>2</sub> H <sub>5</sub> NO <sub>2</sub> | 75.0320 | Nitroethane, Ethyl nitrite               | PTR  | 1    | 50 | 0.1   |
| CS <sub>2</sub>                               | 75.9441 | Carbon disulfide                         | TOGA |      | 50 | 1.98  |
| C <sub>6</sub> H <sub>6</sub>                 | 78.0470 | Benzene                                  | PTR  | 0.95 | 15 | 1.2   |
| C <sub>6</sub> H <sub>6</sub>                 |         | Fragments                                | PTR  | 0.05 |    |       |
| C <sub>5</sub> H <sub>5</sub> N               | 79.0422 | Pentadienenitriles                       | PTR  | 0.56 | 50 | 5.6   |

|                                               |         |                                  |      |      |    |      |
|-----------------------------------------------|---------|----------------------------------|------|------|----|------|
| C <sub>5</sub> H <sub>5</sub> N               | 79.0422 | Pyridine                         | PTR  | 0.44 | 50 | 5.6  |
| C <sub>5</sub> H <sub>4</sub> O               | 80.0262 | 2,4-Cyclopentadiene-1-one        | PTR  | 0.42 | 50 | 20   |
| C <sub>5</sub> H <sub>4</sub> O               |         | Fragments                        | PTR  | 0.58 |    |      |
| C <sub>5</sub> H <sub>7</sub> N               | 81.0578 | Pentenenitriles                  | PTR  | 0.67 | 50 | 62.7 |
| C <sub>5</sub> H <sub>7</sub> N               | 81.0578 | Methylpyrroles                   | PTR  | 0.33 | 50 | 62.7 |
| C <sub>5</sub> H <sub>6</sub> O               | 82.0419 | 2-Methylfuran                    | TOGA |      | 20 | 100  |
| C <sub>5</sub> H <sub>6</sub> O               | 82.0419 | 3-Methyl furan                   | TOGA |      | 20 | 100  |
| C <sub>6</sub> H <sub>10</sub>                | 82.0783 | 2,2-Dimethylbutane               | AWAS |      | 10 | 5.95 |
| C <sub>5</sub> H <sub>9</sub> N               | 83.0735 | Pentanenitriles                  | PTR  | 1    | 50 | 0.5  |
| C <sub>4</sub> H <sub>4</sub> O <sub>2</sub>  | 84.0211 | 2(3H)-Furanone                   | PTR  | 0.81 | 50 | 44.5 |
| C <sub>5</sub> H <sub>8</sub> O               | 84.0575 | 3-Methyl-3-buten-2-one           | PTR  | 0.37 | 50 | 11.5 |
| C <sub>5</sub> H <sub>8</sub> O               | 84.0575 | Cyclopentanone                   | PTR  | 0.18 | 50 | 11.5 |
| C <sub>5</sub> H <sub>8</sub> O               |         | Fragments                        | PTR  | 0.45 |    |      |
| C <sub>6</sub> H <sub>12</sub>                | 84.0939 | Cyclohexane                      | AWAS |      | 10 | 7.2  |
| C <sub>4</sub> H <sub>6</sub> O <sub>2</sub>  | 86.0368 | 2,3-Butanedione                  | PTR  | 0.87 | 50 | 0.8  |
| C <sub>4</sub> H <sub>6</sub> O <sub>2</sub>  | 86.0368 | Methyl acrylate                  | PTR  | 0.05 | 50 | 0.8  |
| C <sub>4</sub> H <sub>6</sub> O <sub>2</sub>  |         | Fragments                        | PTR  | 0.08 |    |      |
| C <sub>5</sub> H <sub>10</sub> O              | 86.0732 | 3-Methyl-2-butanone              | PTR  | 0.43 | 50 | 7.9  |
| C <sub>5</sub> H <sub>10</sub> O              | 86.0732 | 2-Pentanone                      | PTR  | 0.32 | 50 | 7.9  |
| C <sub>5</sub> H <sub>10</sub> O              | 86.0732 | 3-Pentanone                      | PTR  | 0.21 | 50 | 7.9  |
| C <sub>5</sub> H <sub>10</sub> O              | 86.0732 | 2-Methylbutanal, 3-Methylbutanal | PTR  | 0.04 | 50 | 7.9  |
| C <sub>6</sub> H <sub>14</sub>                | 86.1096 | n-Hexane                         | AWAS |      | 10 | 5.4  |
| C <sub>6</sub> H <sub>14</sub>                | 86.1096 | 3-Methylpentane                  | AWAS |      | 10 | 5.45 |
| C <sub>3</sub> H <sub>4</sub> O <sub>3</sub>  | 88.0160 | Pyruvic acid                     | PTR  | 1    | 50 | 0.1  |
| C <sub>4</sub> H <sub>8</sub> O <sub>2</sub>  | 88.0524 | Methyl propanoate                | PTR  | 1    | 50 | 0.9  |
| C <sub>3</sub> H <sub>7</sub> NO <sub>2</sub> | 89.0477 | Nitropropanes                    | PTR  | 1    | 50 | 1.2  |
| C <sub>7</sub> H <sub>16</sub>                | 90.0470 | 2,4-Dimethylpentane              | AWAS |      | 10 | 6.89 |
| C <sub>6</sub> H <sub>5</sub> N               | 91.0422 | Ethylpyrrole                     | PTR  | 1    | 50 | 145  |
| C <sub>7</sub> H <sub>8</sub>                 | 92.0626 | Toluene                          | PTR  | 1    | 15 | 5.6  |
| C <sub>5</sub> H <sub>3</sub> NO              | 93.0215 | 3-Furancarbonitrile              | PTR  | 0.7  | 50 | 40   |
| C <sub>5</sub> H <sub>3</sub> NO              | 93.0215 | 2-Furancarbonitrile              | PTR  | 0.3  | 50 | 40   |
| C <sub>6</sub> H <sub>7</sub> N               | 93.0578 | 2-Methylpyridine                 | PTR  | 0.93 | 50 | 2.6  |
| C <sub>6</sub> H <sub>7</sub> N               | 93.0578 | 3-Methylpyridine                 | PTR  | 0.07 | 50 | 2.6  |
| C <sub>6</sub> H <sub>6</sub> O               | 94.0419 | Phenol                           | CIMS |      | 30 | 28   |
| C <sub>5</sub> H <sub>4</sub> O <sub>2</sub>  | 96.0211 | 2-Furfural (=furaldehyde)        | PTR  | 0.84 | 20 | 35.6 |
| C <sub>5</sub> H <sub>4</sub> O <sub>2</sub>  | 96.0211 | 3-Furfural                       | PTR  | 0.04 | 20 | 35.6 |
| C <sub>5</sub> H <sub>4</sub> O <sub>2</sub>  |         | Fragments                        | PTR  | 0.11 |    |      |
| C <sub>6</sub> H <sub>8</sub> O               | 96.0575 | C2-Substituted furan isomers     | PTR  | 0.46 | 50 | 132  |
| C <sub>6</sub> H <sub>8</sub> O               | 96.0575 | 2,5-Dimethylfuran                | PTR  | 0.44 | 50 | 132  |
| C <sub>6</sub> H <sub>8</sub> O               | 96.0575 | 2-Ethylfuran                     | PTR  | 0.1  | 50 | 132  |
| C <sub>6</sub> H <sub>11</sub> N              | 97.0891 | 4-Methylpentanenitrile           | PTR  | 1    | 50 | 5    |

|                                               |          |                                            |      |      |    |      |
|-----------------------------------------------|----------|--------------------------------------------|------|------|----|------|
| C <sub>4</sub> H <sub>2</sub> O <sub>3</sub>  | 98.0004  | Maleic anhydride                           | PTR  | 1    | 50 | 1.4  |
| C <sub>5</sub> H <sub>6</sub> O <sub>2</sub>  | 98.0368  | 2-Furanmethanol                            | PTR  | 0.34 | 50 | 13.6 |
| C <sub>5</sub> H <sub>6</sub> O <sub>2</sub>  |          | Fragments                                  | PTR  | 0.66 |    |      |
| C <sub>6</sub> H <sub>10</sub> O              | 98.0732  | C6H10O Ketones                             | PTR  | 0.74 | 50 | 6.4  |
| C <sub>6</sub> H <sub>10</sub> O              | 98.0732  | Methylcyclopentanone,<br>Cyclohexanone     | PTR  | 0.26 | 50 | 6.4  |
| C <sub>7</sub> H <sub>14</sub>                | 98.1096  | Methylcyclohexane                          | AWAS |      | 10 | 11   |
| C <sub>4</sub> H <sub>4</sub> O <sub>3</sub>  | 100.0160 | Dihydrofuranidone (=succinic<br>anhydride) | PTR  | 1    | 50 | 20   |
| C <sub>5</sub> H <sub>8</sub> O <sub>2</sub>  | 100.0524 | Methyl methacrylate                        | PTR  | 0.69 | 50 | 30.3 |
| C <sub>5</sub> H <sub>8</sub> O <sub>2</sub>  |          | Fragments                                  | PTR  | 0.31 |    |      |
| C <sub>6</sub> H <sub>12</sub> O              | 100.0888 | Hexanones                                  | PTR  | 0.53 | 30 | 18.6 |
| C <sub>6</sub> H <sub>12</sub> O              | 100.0888 | Hexanal                                    | PTR  | 0.47 | 30 | 18.6 |
| C <sub>7</sub> H <sub>16</sub>                | 100.1252 | n-Heptane                                  | AWAS |      | 10 | 7.11 |
| C <sub>7</sub> H <sub>16</sub>                | 100.1252 | 2-Methylhexane                             | AWAS |      | 10 | 6.7  |
| C <sub>7</sub> H <sub>16</sub>                | 100.1252 | 3-Methylhexane                             | AWAS |      | 10 | 6.3  |
| C <sub>7</sub> H <sub>16</sub>                | 100.1252 | 2,3-Dimethylpentane                        | AWAS |      | 10 | 6.89 |
| C <sub>4</sub> H <sub>6</sub> O <sub>3</sub>  | 102.0317 | Acetic anhydride                           | PTR  | 1    | 50 | 43   |
| C <sub>7</sub> H <sub>5</sub> N               | 103.0422 | Benzonitrile                               | PTR  | 1    | 50 | 1    |
| C <sub>8</sub> H <sub>8</sub>                 | 104.0626 | Styrene                                    | TOGA |      | 40 | 58   |
| C <sub>3</sub> H <sub>7</sub> NO <sub>3</sub> | 105.0426 | Isopropyl nitrate                          | TOGA |      | 15 | 0.42 |
| C <sub>3</sub> H <sub>7</sub> NO <sub>3</sub> | 105.0426 | n-Propyl nitrate                           | TOGA |      | 15 | 0.73 |
| C <sub>7</sub> H <sub>7</sub> N               | 105.0578 | Vinylpyridine                              | PTR  | 1    | 50 | 57   |
| C <sub>7</sub> H <sub>6</sub> O               | 106.0419 | Benzaldehyde                               | PTR  | 1    | 50 | 12   |
| C <sub>8</sub> H <sub>10</sub>                | 106.0783 | ( <i>m,p</i> )-Xylenes                     | PTR  | 0.46 | 20 | 13.2 |
| C <sub>8</sub> H <sub>10</sub>                | 106.0783 | Ethylbenzene                               | PTR  | 0.36 | 20 | 13.2 |
| C <sub>8</sub> H <sub>10</sub>                | 106.0783 | <i>o</i> -Xylene                           | PTR  | 0.18 | 20 | 13.2 |
| C <sub>6</sub> H <sub>4</sub> O <sub>2</sub>  | 108.0211 | Quinone (=p-benzoquinone)                  | PTR  | 1    | 50 | 4.6  |
| C <sub>7</sub> H <sub>8</sub> O               | 108.0575 | 2-Methylphenol (=o-cresol)                 | PTR  | 0.5  | 50 | 26.2 |
| C <sub>7</sub> H <sub>8</sub> O               | 108.0575 | Anisol                                     | PTR  | 0.5  | 50 | 26.2 |
| C <sub>6</sub> H <sub>6</sub> O <sub>2</sub>  | 110.0368 | 5-Methyl furfural                          | PTR  | 0.5  | 30 | 80.1 |
| C <sub>6</sub> H <sub>6</sub> O <sub>2</sub>  | 110.0368 | Benzene diols (=catechol,<br>resorcinol)   | PTR  | 0.5  | 30 | 80.1 |
| C <sub>7</sub> H <sub>10</sub> O              | 110.0732 | C3 Furans                                  | PTR  | 0.55 | 50 | 23.3 |
| C <sub>7</sub> H <sub>10</sub> O              |          | Fragments                                  | PTR  | 0.45 |    |      |
| C <sub>5</sub> H <sub>5</sub> NO <sub>2</sub> | 111.0320 | Dihydroxy pyridine                         | PTR  | 0.5  | 50 | 10.3 |
| C <sub>5</sub> H <sub>5</sub> NO <sub>2</sub> | 111.0320 | Methyl maleimide                           | PTR  | 0.5  | 50 | 10.3 |
| C <sub>5</sub> H <sub>4</sub> O <sub>3</sub>  | 112.0160 | 5-Hydroxy 2-furfural/2-furoic<br>acid      | PTR  | 1    | 50 | 49   |
| C <sub>6</sub> H <sub>8</sub> O <sub>2</sub>  | 112.0524 | 2-Hydroxy-3-methyl-2-<br>cyclopenten-1-one | PTR  | 1    | 50 | 57   |
| C <sub>7</sub> H <sub>12</sub> O              | 112.0888 | Ethylcyclopentanone                        | PTR  | 1    | 50 | 10   |
| C <sub>4</sub> H <sub>3</sub> NO <sub>3</sub> | 113.0113 | Nitrofuran                                 | PTR  | 1    | 50 | 40   |
| C <sub>5</sub> H <sub>6</sub> O <sub>3</sub>  | 114.0317 | 5-Hydroxymethyl-2[3H]-<br>furanone         | PTR  | 0.5  | 50 | 100  |
| C <sub>6</sub> H <sub>10</sub> O <sub>2</sub> | 114.0681 | C6 1-DBE esters                            | PTR  | 0.54 | 50 | 20   |

|                                               |          |                                                                              |      |      |    |       |
|-----------------------------------------------|----------|------------------------------------------------------------------------------|------|------|----|-------|
| C <sub>6</sub> H <sub>10</sub> O <sub>2</sub> | 114.0681 | C6 Diones                                                                    | PTR  | 0.46 | 50 | 20    |
| C <sub>7</sub> H <sub>14</sub> O              | 114.1045 | Heptanal                                                                     | PTR  | 0.63 | 50 | 21.4  |
| C <sub>7</sub> H <sub>14</sub> O              | 114.1045 | 2,4-Dimethyl-3-pentanone                                                     | PTR  | 0.24 | 50 | 21.4  |
| C <sub>7</sub> H <sub>14</sub> O              | 114.1045 | Heptanone                                                                    | PTR  | 0.13 | 50 | 21.4  |
| C <sub>8</sub> H <sub>18</sub>                | 114.1409 | 2,2,4-Trimethylpentane                                                       | TOGA |      | 15 | 5.4   |
| C <sub>8</sub> H <sub>18</sub>                | 114.1409 | n-Octane                                                                     | AWAS |      | 10 | 8.11  |
| C <sub>8</sub> H <sub>18</sub>                | 114.1409 | 2-Methylheptane                                                              | AWAS |      | 10 | 12.2  |
| C <sub>8</sub> H <sub>18</sub>                | 114.1409 | 2,3,4-Trimethylpentane                                                       | AWAS |      | 10 | 6.5   |
| C <sub>8</sub> H <sub>18</sub>                | 114.1409 | 3-Methylheptane                                                              | AWAS |      | 10 | 14    |
| C <sub>5</sub> H <sub>8</sub> O <sub>3</sub>  | 116.0473 | 5-Hydroxymethyl tetrahydro<br>2-furanone, 5-Hydroxy<br>tetrahydro 2-furfural | PTR  | 1    | 50 | 5     |
| C <sub>6</sub> H <sub>12</sub> O <sub>2</sub> | 116.0837 | C6 Esters                                                                    | PTR  | 1    | 50 | 6     |
| C <sub>8</sub> H <sub>7</sub> N               | 117.0578 | Benzeneacetonitrile                                                          | PTR  | 1    | 50 | 1.2   |
| C <sub>8</sub> H <sub>6</sub> O               | 118.0419 | Benzofuran                                                                   | PTR  | 1    | 50 | 37    |
| C <sub>9</sub> H <sub>10</sub>                | 118.0783 | Methyl styrenes                                                              | PTR  | 0.84 | 50 | 50.4  |
| C <sub>9</sub> H <sub>10</sub>                | 118.0783 | Indane                                                                       | PTR  | 0.13 | 50 | 50.4  |
| C <sub>9</sub> H <sub>10</sub>                | 118.0783 | Propenyl benzenes                                                            | PTR  | 0.03 | 50 | 50.4  |
| C <sub>8</sub> H <sub>8</sub> O               | 120.0575 | Tolualdehyde                                                                 | PTR  | 1    | 50 | 16    |
| C <sub>9</sub> H <sub>12</sub>                | 120.0939 | C9 Aromatics                                                                 | PTR  | 1    | 15 | 22    |
| C <sub>7</sub> H <sub>6</sub> O <sub>2</sub>  | 122.0368 | 2-Hydroxybenzaldehyde                                                        | PTR  | 1    | 50 | 38    |
| C <sub>8</sub> H <sub>10</sub> O              | 122.0732 | C2 Phenols                                                                   | PTR  | 0.5  | 50 | 46.6  |
| C <sub>8</sub> H <sub>10</sub> O              | 122.0732 | Methyl anisol                                                                | PTR  | 0.5  | 50 | 46.6  |
| C <sub>6</sub> H <sub>4</sub> O <sub>3</sub>  | 124.0160 | Hydroxy benzoquinone                                                         | PTR  | 1    | 50 | 4.6   |
| C <sub>7</sub> H <sub>8</sub> O <sub>2</sub>  | 124.0524 | Guaiacol (=2-methoxyphenol)                                                  | PTR  | 1    | 50 | 75    |
| C <sub>6</sub> H <sub>6</sub> O <sub>3</sub>  | 126.0317 | 5-(Hydroxymethyl)-2-furfural                                                 | PTR  | 1    | 50 | 100   |
| C <sub>9</sub> H <sub>20</sub>                | 128.1565 | n-Nonane                                                                     | AWAS |      | 10 | 9.7   |
| C <sub>9</sub> H <sub>8</sub> O               | 132.0575 | Methylbenzofuran                                                             | PTR  | 1    | 50 | 37    |
| C <sub>10</sub> H <sub>12</sub>               | 132.0939 | Ethyl styrene                                                                | PTR  | 0.5  | 50 | 33    |
| C <sub>10</sub> H <sub>12</sub>               | 132.0939 | Methylpropenylbenzenes,<br>Butenylbenzenes                                   | PTR  | 0.5  | 50 | 33    |
| C <sub>9</sub> H <sub>10</sub> O              | 134.0732 | 3-Methylacetophenone                                                         | PTR  | 1    | 50 | 4.5   |
| C <sub>10</sub> H <sub>14</sub>               | 134.1096 | C10 Aromatics                                                                | PTR  | 0.92 | 15 | 9.5   |
| C <sub>10</sub> H <sub>15</sub>               |          | Fragments                                                                    | PTR  | 0.8  |    |       |
| C <sub>8</sub> H <sub>8</sub> O <sub>2</sub>  | 136.0524 | Methyl benzoic acid                                                          | PTR  | 1    | 50 | 12    |
| C <sub>10</sub> H <sub>16</sub>               | 136.1252 | Camphene                                                                     | PTR  | 0.38 | 40 | 162.8 |
| C <sub>10</sub> H <sub>16</sub>               | 136.1252 | α-Pinene                                                                     | PTR  | 0.33 | 40 | 162.8 |
| C <sub>10</sub> H <sub>16</sub>               | 136.1252 | β-Pinene, Myrcene                                                            | PTR  | 0.21 | 40 | 162.8 |
| C <sub>10</sub> H <sub>16</sub>               | 136.1252 | Tricyclene                                                                   | PTR  | 0.07 | 40 | 162.8 |
| C <sub>7</sub> H <sub>7</sub> NO <sub>2</sub> | 137.0477 | Nitrotoluene                                                                 | PTR  | 1    | 50 | 0.1   |
| C <sub>8</sub> H <sub>10</sub> O <sub>2</sub> | 138.0681 | 2-Methoxy-4-methylphenol<br>(=creosol)                                       | PTR  | 1    | 50 | 100   |
| C <sub>11</sub> H <sub>10</sub>               | 142.0783 | Methylnaphthalene                                                            | PTR  | 1    | 50 | 50    |
| C <sub>6</sub> H <sub>8</sub> O <sub>4</sub>  | 144.0423 | Product of levoglucosan<br>dehydration (pyrolysis)                           | PTR  | 1    | 50 | 4.6   |



|                                                |          |                               |     |     |    |     |
|------------------------------------------------|----------|-------------------------------|-----|-----|----|-----|
| C <sub>10</sub> H <sub>10</sub> O              | 146.0732 | Dimethylbenzofuran            | PTR | 1   | 50 | 37  |
| C <sub>10</sub> H <sub>12</sub> O              | 148.0888 | Methyl chavicol (=estragole)  | PTR | 1   | 50 | 50  |
| C <sub>11</sub> H <sub>16</sub>                | 148.1252 | C11 Aromatics                 | PTR | 1   | 50 | 50  |
| C <sub>9</sub> H <sub>10</sub> O <sub>2</sub>  | 150.0681 | Vinyl guaiacol                | PTR | 1   | 50 | 100 |
| C <sub>8</sub> H <sub>8</sub> O <sub>3</sub>   | 152.0473 | Vanillin                      | PTR | 1   | 50 | 85  |
| C <sub>10</sub> H <sub>16</sub> O              | 152.1201 | Oxygenated monoterpenes       | PTR | 0.7 | 50 | 4.3 |
| C <sub>10</sub> H <sub>16</sub> O              | 152.1201 | Camphor                       | PTR | 0.3 | 50 | 4.3 |
| C <sub>8</sub> H <sub>10</sub> O <sub>3</sub>  | 154.0630 | Syringol                      | PTR | 1   | 50 | 100 |
| C <sub>10</sub> H <sub>18</sub> O              | 154.1358 | Cineole                       | PTR | 1   | 50 | 25  |
| C <sub>10</sub> H <sub>18</sub> O              | 154.1358 | Other oxygenated monoterpenes | PTR | 0   | 50 | 25  |
| C <sub>12</sub> H <sub>12</sub>                | 156.0939 | 1,3-Dimethylnaphthalene       | PTR | 1   | 50 | 60  |
| C <sub>10</sub> H <sub>20</sub> O              | 156.1514 | Decanal                       | PTR | 1   | 50 | 13  |
| C <sub>12</sub> H <sub>18</sub>                | 162.1409 | C12 aromatics                 | PTR | 1   | 50 | 113 |
| C <sub>10</sub> H <sub>12</sub> O <sub>2</sub> | 164.0837 | Eugenol, Isoeugenol           | PTR | 1   | 50 | 100 |
| C <sub>13</sub> H <sub>20</sub>                | 176.1565 | C13 aromatics                 | PTR | 1   | 50 | 113 |
| C <sub>15</sub> H <sub>24</sub>                | 204.1878 | Sesquiterpenes                | PTR | 1   | 50 | 300 |

**Table S2.** Global Fire Assimilation System version 1.2 (GFAS) emission inventory estimates for the 21 biomass burning VOC species and CO implemented in GEOS-Chem version 13.3.2. GFAS emissions were retrieved for July–September 2018 over the western U.S. domain (36° N-127° W, 49.5° N-105° W). Note that GFAS ERs for lumped aldehydes, MEK, formic acid, and acetic acid were updated based on Permar et al. (2021)

| GEOS-Chem Species                 | Formula                                      | $k_{OH}$ | Total emissions (Gg carbon) |
|-----------------------------------|----------------------------------------------|----------|-----------------------------|
| CO                                | CO                                           | 0.14     | 1690                        |
| Ethane                            | C <sub>2</sub> H <sub>6</sub>                | 0.25     | 19                          |
| Propane                           | C <sub>3</sub> H <sub>8</sub>                | 1.09     | 6.37                        |
| Lumped C <sub>≥</sub> 4 alkanes   | -                                            | 4.2      | 7.95                        |
| Ethene                            | C <sub>2</sub> H <sub>4</sub>                | 8.5      | 42                          |
| Lumped C <sub>≥</sub> 3 alkenes   | -                                            | 30.7     | 35                          |
| Methanol                          | CH <sub>4</sub> O                            | 0.9      | 34                          |
| Ethanol                           | C <sub>2</sub> H <sub>6</sub> O              | 3.2      | 0.47                        |
| Benzene                           | C <sub>6</sub> H <sub>6</sub>                | 1.22     | 17                          |
| Toluene                           | C <sub>7</sub> H <sub>8</sub>                | 5.6      | 12                          |
| Xylenes                           | C <sub>8</sub> H <sub>10</sub>               | 13.2     | 1.26                        |
| Isoprene                          | C <sub>5</sub> H <sub>8</sub>                | 100      | 2.46                        |
| Formaldehyde                      | CH <sub>2</sub> O                            | 8.95     | 25                          |
| Acetaldehyde                      | C <sub>2</sub> H <sub>4</sub> O              | 15       | 19                          |
| Lumped C <sub>≥</sub> 3 aldehydes | -                                            | 18.7     | 4.82                        |
| Dimethyl sulfide                  | C <sub>2</sub> H <sub>6</sub> S              | 6        | 0.59                        |
| Acetone                           | C <sub>3</sub> H <sub>6</sub> O              | 0.2      | 17                          |
| Methyl Ethyl Ketone               | C <sub>4</sub> H <sub>8</sub> O              | 1.2      | 4.65                        |
| Methacrolein                      | C <sub>4</sub> H <sub>6</sub> O              | 2.8      | 2.35                        |
| Glycolaldehyde                    | C <sub>2</sub> H <sub>4</sub> O <sub>2</sub> | 1.2      | 9.14                        |
| Formic acid                       | CH <sub>2</sub> O <sub>2</sub>               | 0.4      | 15.12                       |
| Acetic acid                       | C <sub>2</sub> H <sub>4</sub> O <sub>2</sub> | 3.7      | 29.18                       |

**Table S3.** Initialization values used for the Framework for 0-D Atmospheric Modeling of the Taylor Creek Fire.

| Compound         | Formula                                       | Taylor Creek Fire (ppb) |
|------------------|-----------------------------------------------|-------------------------|
| CO               | CO                                            | 5670.68                 |
| NO               | NO                                            | 6.76                    |
| NO <sub>2</sub>  | NO <sub>2</sub>                               | 58.86                   |
| HONO             | HONO                                          | 64.49                   |
| Ozone            | O <sub>3</sub>                                | 31.75                   |
| Furan            | C <sub>4</sub> H <sub>4</sub> O               | 6.33                    |
| Benzene          | C <sub>6</sub> H <sub>6</sub>                 | 8.10                    |
| HNO <sub>3</sub> | HNO <sub>3</sub>                              | 21.00                   |
| Guaiacol         | C <sub>7</sub> H <sub>8</sub> O <sub>2</sub>  | 1.05                    |
| PAN              | C <sub>2</sub> H <sub>3</sub> NO <sub>5</sub> | 6.90                    |
| Isoprene         | C <sub>5</sub> H <sub>8</sub>                 | 1.19                    |
| Ethene           | C <sub>2</sub> H <sub>4</sub>                 | 82.53                   |
| Catechol         | C <sub>6</sub> H <sub>6</sub> O <sub>2</sub>  | 1.00                    |
| 2-Methylfuran    | C <sub>5</sub> H <sub>6</sub> O               | 1.56                    |
| Methylfurfural   | C <sub>6</sub> H <sub>6</sub> O <sub>2</sub>  | 1.00                    |
| Dimethylfuran    | C <sub>6</sub> H <sub>8</sub> O               | 0.67                    |
| Syringol         | C <sub>8</sub> H <sub>10</sub> O <sub>3</sub> | 0.07                    |
| 3-Methylfuran    | C <sub>5</sub> H <sub>6</sub> O               | 0.31                    |
| Formaldehyde     | CH <sub>2</sub> O                             | 126.05                  |
| Acetaldehyde     | C <sub>2</sub> H <sub>4</sub> O               | 53.88                   |
| Acetone          | C <sub>3</sub> H <sub>6</sub> O               | 14.34                   |
| Propanal         | C <sub>3</sub> H <sub>6</sub> O               | 2.94                    |
| MVK              | C <sub>4</sub> H <sub>6</sub> O               | 4.90                    |
| MACR             | C <sub>4</sub> H <sub>6</sub> O               | 2.29                    |
| PPN              | C <sub>3</sub> H <sub>5</sub> NO <sub>5</sub> | 0.84                    |
| Phenol           | C <sub>6</sub> H <sub>6</sub> O               | 4.23                    |
| o-Xylene         | C <sub>8</sub> H <sub>10</sub>                | 0.29                    |
| α-Pinene         | C <sub>10</sub> H <sub>16</sub>               | 0.34                    |
| p-Xylene         | C <sub>8</sub> H <sub>10</sub>                | 0.75                    |
| Cresol           | C <sub>7</sub> H <sub>8</sub> O               | 1.81                    |
| 1-Butene         | C <sub>4</sub> H <sub>8</sub>                 | 5.03                    |
| n-Butane         | C <sub>4</sub> H <sub>10</sub>                | 0.90                    |

|                         |                                              |       |
|-------------------------|----------------------------------------------|-------|
| Ethylbenzene            | C <sub>8</sub> H <sub>10</sub>               | 0.59  |
| 1,2,3-Trimethylbenzene  | C <sub>9</sub> H <sub>12</sub>               | 0.42  |
| Styrene                 | C <sub>8</sub> H <sub>8</sub>                | 1.59  |
| Benzaldehyde            | C <sub>7</sub> H <sub>6</sub> O              | 1.07  |
| n-Pentane               | C <sub>5</sub> H <sub>12</sub>               | 1.05  |
| n-Hexane                | C <sub>6</sub> H <sub>14</sub>               | 0.22  |
| n-Heptane               | C <sub>7</sub> H <sub>16</sub>               | 0.18  |
| n-Octane                | C <sub>8</sub> H <sub>18</sub>               | 0.11  |
| 3-Methyl-1-butene       | C <sub>5</sub> H <sub>10</sub>               | 0.27  |
| 1-Hexene                | C <sub>6</sub> H <sub>12</sub>               | 1.69  |
| β-Pinene                | C <sub>10</sub> H <sub>16</sub>              | 0.22  |
| Acrolein                | C <sub>3</sub> H <sub>4</sub> O              | 5.50  |
| 2-Butenal               | C <sub>4</sub> H <sub>6</sub> O              | 1.06  |
| Butanal                 | C <sub>4</sub> H <sub>8</sub> O              | 0.27  |
| Pentanal                | C <sub>5</sub> H <sub>10</sub> O             | 0.38  |
| Propene                 | C <sub>3</sub> H <sub>6</sub>                | 17.43 |
| Butadiene               | C <sub>4</sub> H <sub>6</sub>                | 7.27  |
| Glyoxal                 | C <sub>2</sub> H <sub>2</sub> O <sub>2</sub> | 0.29  |
| Sesquiterpenes          | C <sub>15</sub> H <sub>24</sub>              | 0.02  |
| Methylglyoxal           | C <sub>3</sub> H <sub>4</sub> O <sub>2</sub> | 2.63  |
| Biacetyl                | C <sub>4</sub> H <sub>6</sub> O <sub>2</sub> | 2.43  |
| Formic acid             | CH <sub>2</sub> O <sub>2</sub>               | 51.1  |
| Acetic acid             | C <sub>2</sub> H <sub>4</sub> O <sub>2</sub> | 32.09 |
| Acetol                  | C <sub>3</sub> H <sub>6</sub> O <sub>2</sub> | 2.91  |
| Furfural (=furaldehyde) | C <sub>5</sub> H <sub>4</sub> O <sub>2</sub> | 7.34  |

## References:

- 1 A. R. Koss, K. Sekimoto, J. B. Gilman, V. Selimovic, M. M. Coggon, K. J. Zarzana, B. Yuan, B. M. Lerner, S. S. Brown, J. L. Jimenez, J. Krechmer, J. M. Roberts, C. Warneke, R. J. Yokelson and J. de Gouw, Non-methane organic gas emissions from biomass burning: identification, quantification, and emission factors from PTR-ToF during the FIREX 2016 laboratory experiment, *Atmos. Chem. Phys.*, 2018, **18**, 3299–3319.
- 2 W. Permar, Q. Wang, V. Selimovic, C. Wielgasz, R. J. Yokelson, R. S. Hornbrook, A. J. Hills, E. C. Apel, I.-T. Ku, Y. Zhou, B. C. Sive, A. P. Sullivan, J. L. Collett Jr, T. L. Campos, B. B. Palm, Q. Peng, J. A. Thornton, L. A. Garofalo, D. K. Farmer, S. M. Kreidenweis, E. J. T. Levin, P. J. DeMott, F. Flocke, E. V. Fischer and L. Hu, Emissions of Trace Organic Gases From Western U.S. Wildfires Based on WE-CAN Aircraft Measurements, *Journal of Geophysical Research: Atmospheres*, 2021, **126**, e2020JD033838.
